- and heart rate variability in resident physicians within a general hospital. *Am J Ind Med* 2013; 56:38–48
44. Collins SM, Karasek RA, Costas K: Job strain and autonomic indices of cardiovascular disease risk. *Am J Ind Med* 2005; 48:182–93
  45. Eller NH, Kristiansen J, Hansen AM: Long-term effects of psychosocial factors of home and work on biomarkers of stress. *Int J Psychophysiol* 2011; 79:195–202
  46. Dishman RK, Nakamura Y, Garcia ME, Thompson RW, Dunn AL, Blair SN: Heart rate variability, trait anxiety, and perceived stress among physically fit men and women. *Int J Psychophysiol* 2000; 37:121–33
  47. van Amelsvoort LG, Schouten EG, Maan AC, Swenne CA, Kok FJ: Occupational determinants of heart rate variability. *Int Arch Occup Environ Health* 2000; 73:255–62
  48. Riese H, Van Doornen LJ, Houtman IL, De Geus EJ: Job strain in relation to ambulatory blood pressure, heart rate, and heart rate variability among female nurses. *Scand J Work Environ Health* 2004; 30:477–85
  49. Stein PK, Pu Y: Heart rate variability, sleep and sleep disorders. *Sleep Med Rev* 2012; 16:47–66
  50. Wallston KA, Wallston BS, Smith S, Dobbins CJ: Perceived control and health. *Curr Psychol* 1987; 6:5–25
  51. Cohen S, Janicki-Deverts D, Miller GE: Psychological stress and disease. *JAMA* 2007; 298:1685–7
  52. McEwen BS: Protective and damaging effects of stress mediators. *N Engl J Med* 1998; 338:171–9
  53. Danhof-Pont MB, van Veen T, Zitman FG: Biomarkers in burn-out: A systematic review. *J Psychosom Res* 2011; 70:505–24
  54. Sriram K, Rodriguez-Fernandez M, Doyle FJ III: Modeling cortisol dynamics in the neuro-endocrine axis distinguishes normal, depression, and post-traumatic stress disorder (PTSD) in humans. *PLoS Comput Biol* 2012; 8:e1002379

## ANESTHESIOLOGY REFLECTIONS FROM THE WOOD LIBRARY-MUSEUM

### “Charles Thomas Jackson”—Compliments of J. B. Woodworth

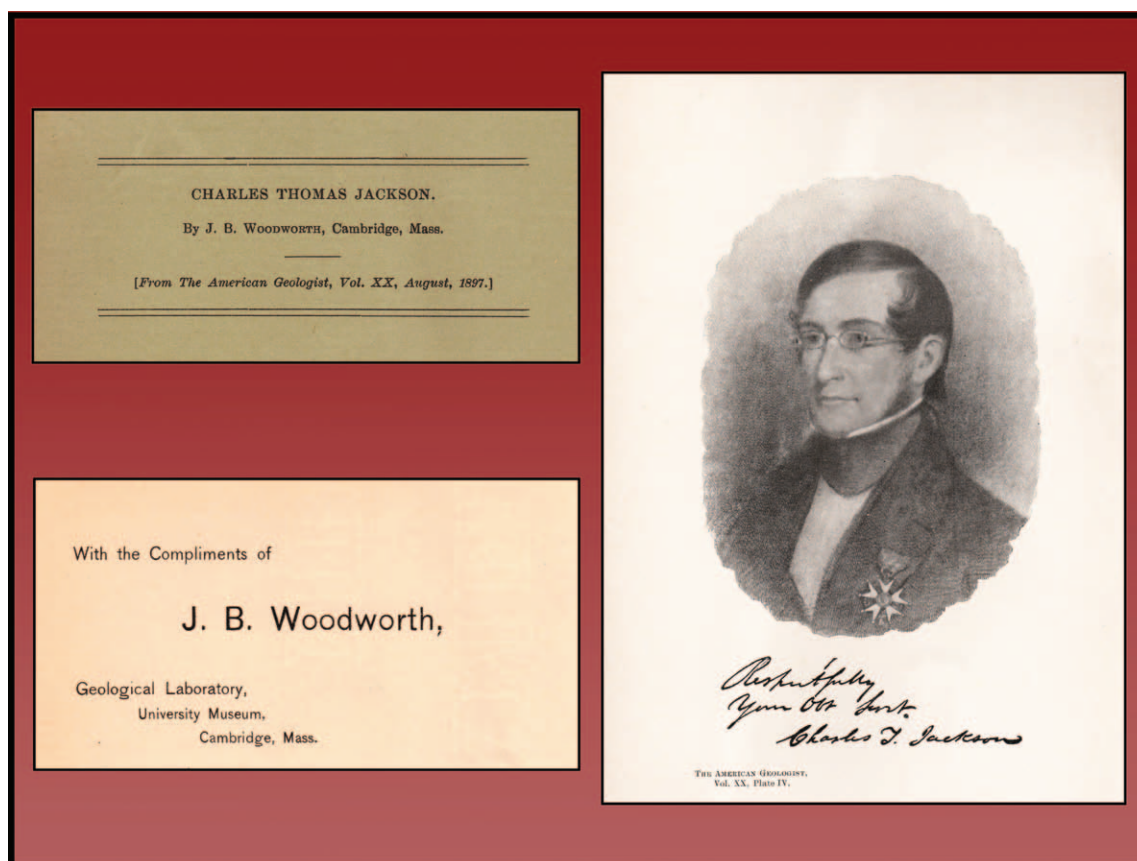

An instructor in Geology at Harvard, Jay Backus Woodworth (1865–1925) published an article (*upper left*) titled “Charles Thomas Jackson” in *The American Geologist* about the life and works of that geological surveyor and ether pioneer. This publication included Jackson’s portrait (*right*) above a copy of his handwritten “Respectfully / Your Obt. Servt. / Charles T. Jackson.” Of great interest to the Wood Library-Museum of Anesthesiology, this particular printing was discovered with the author’s compliments card (*lower left*) still tucked inside. (Copyright © the American Society of Anesthesiologists, Inc.)

George S. Bause, M.D., M.P.H., Honorary Curator, ASA’s Wood Library-Museum of Anesthesiology, Schaumburg, Illinois, and Clinical Associate Professor, Case Western Reserve University, Cleveland, Ohio. UJYC@aol.com.
